# Supplementary material for: Influence of air contamination during heat-assisted plasma treatment on adhesion properties of polytetrafluoroethylene (PTFE)
Source: Royal Society of Chemistry journal article supplement (doi:10.1039/c9ra01789e), 2019-01-01
Supplement: c9ra01789e1.pdf [file c9ra01789e1.pdf]

## Electronic Supporting Information (ESI)

### **Influence of air contamination during heat-assisted plasma treatment on adhesion property of polytetrafluoroethylene (PTFE)**

Yuji Ohkubo,<sup>a</sup> Tetsuya Nakagawa,<sup>a</sup> Katsuyoshi Endo<sup>a</sup> and Kazuya Yamamura<sup>a</sup>

<sup>a</sup>Graduate School of Engineering, Osaka University, 2-1 Yamadaoka, Suita, Osaka 565-0871, Japan

#### **Contents**

- Relation between backpressure and air concentration .....ESI-1
- Gas compositions .....ESI-2
- PTFE sample weight and etching depth .....ESI-3
- Load-indentation depth curves .....ESI-4

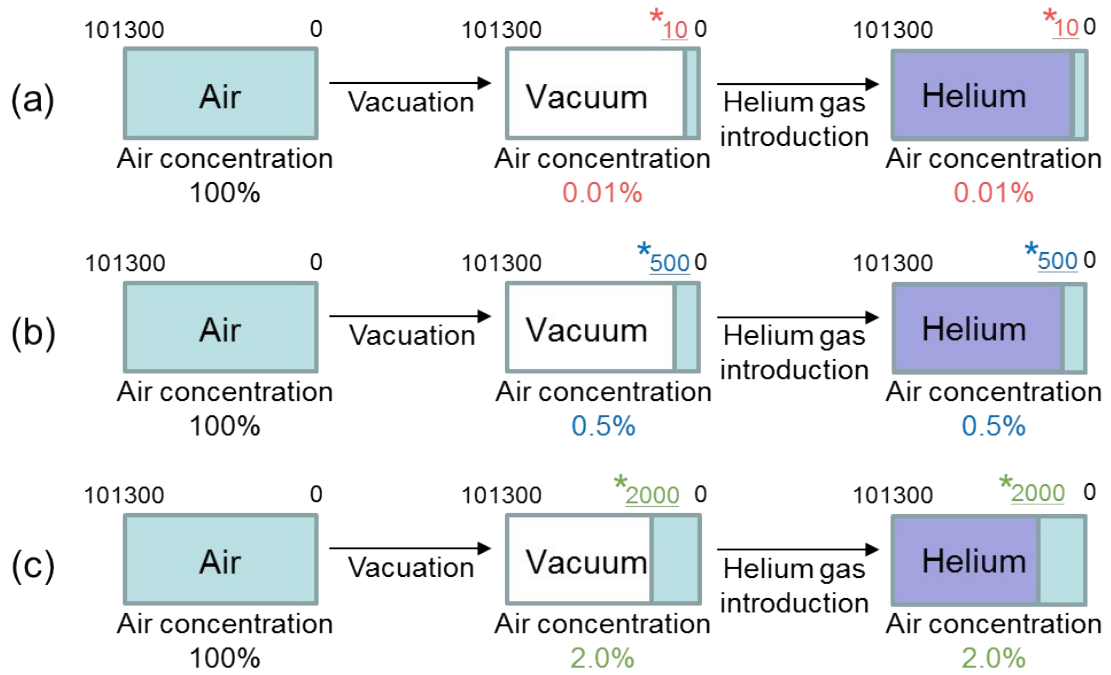

**ESI-1** Schematic of the relation between the backpressure in the chamber and the air concentration: (a) backpressure of 10 Pa and air concentration of 0.01%, (b) backpressure of 500 Pa and air concentration of 0.5%, and (c) backpressure of 2000 Pa and air concentration of 2.0%. The \* symbol and underlining denote the backpressure.

**ESI-2** Gas compositions of the different air concentrations used for HAP treatment. The data were derived from the OES spectra (**Fig. 1**), and each peak intensity was normalized to the peak intensity of helium at 706 nm.

| <b>Species</b> | <b>Wavelength [nm]</b> | <b>0.01% air</b> | <b>0.5% air</b> | <b>2.0% air</b> |
|----------------|------------------------|------------------|-----------------|-----------------|
| OH             | 309                    | 5                | 13              | 19              |
| N <sub>2</sub> | 337                    | 1                | 125             | 172             |
| He             | 706                    | 100              | 100             | 100             |
| O              | 777                    | 14               | 21              | 26              |

**ESI-3** PTFE sample weight before and after treatment and average etching depth with or without HAP treatments in different air concentrations.

| <b>Treatment</b> | <b>Trial</b> | <b>Weight<br/>before<br/>treatment<br/>[mg]</b> | <b>Weight<br/>after<br/>treatment<br/>[mg]</b> | <b>Change<br/>in<br/>weight<br/>[mg]</b> | <b>Average<br/>change in<br/>weight<br/>[mg]</b> | <b>Average<br/>change in<br/>depth <sup>a)</sup><br/>[<math>\mu</math>m]</b> |
|------------------|--------------|-------------------------------------------------|------------------------------------------------|------------------------------------------|--------------------------------------------------|------------------------------------------------------------------------------|
| Heating only     | 1            | 1302.6                                          | 1302.2                                         | 0.4                                      |                                                  |                                                                              |
|                  | 2            | 1345.6                                          | 1345.3                                         | 0.3                                      | 0.2                                              | 0.0                                                                          |
|                  | 3            | 1365.5                                          | 1365.5                                         | 0.0                                      |                                                  |                                                                              |
| 0.01% air        | 1            | 1357.5                                          | 1349.4                                         | 8.1                                      |                                                  |                                                                              |
|                  | 2            | 1351.9                                          | 1344.8                                         | 7.1                                      | 8.5                                              | 0.4                                                                          |
|                  | 3            | 1377.5                                          | 1367.3                                         | 10.2                                     |                                                  |                                                                              |
| 0.5% air         | 1            | 1353.4                                          | 1325.9                                         | 27.5                                     |                                                  |                                                                              |
|                  | 2            | 1355.0                                          | 1333.0                                         | 22.0                                     | 23.7                                             | 1.1                                                                          |
|                  | 3            | 1379.2                                          | 1357.5                                         | 21.7                                     |                                                  |                                                                              |
| 2.0% air         | 1            | 1364.2                                          | 1329.6                                         | 34.6                                     |                                                  |                                                                              |
|                  | 2            | 1355.4                                          | 1317.0                                         | 38.4                                     | 35.2                                             | 1.6                                                                          |
|                  | 3            | 1333.4                                          | 1300.7                                         | 32.7                                     |                                                  |                                                                              |

<sup>a)</sup> The average etching depth was calculated under the assumption that the specific weight of PTFE is 2.150 g·cm<sup>-3</sup>.

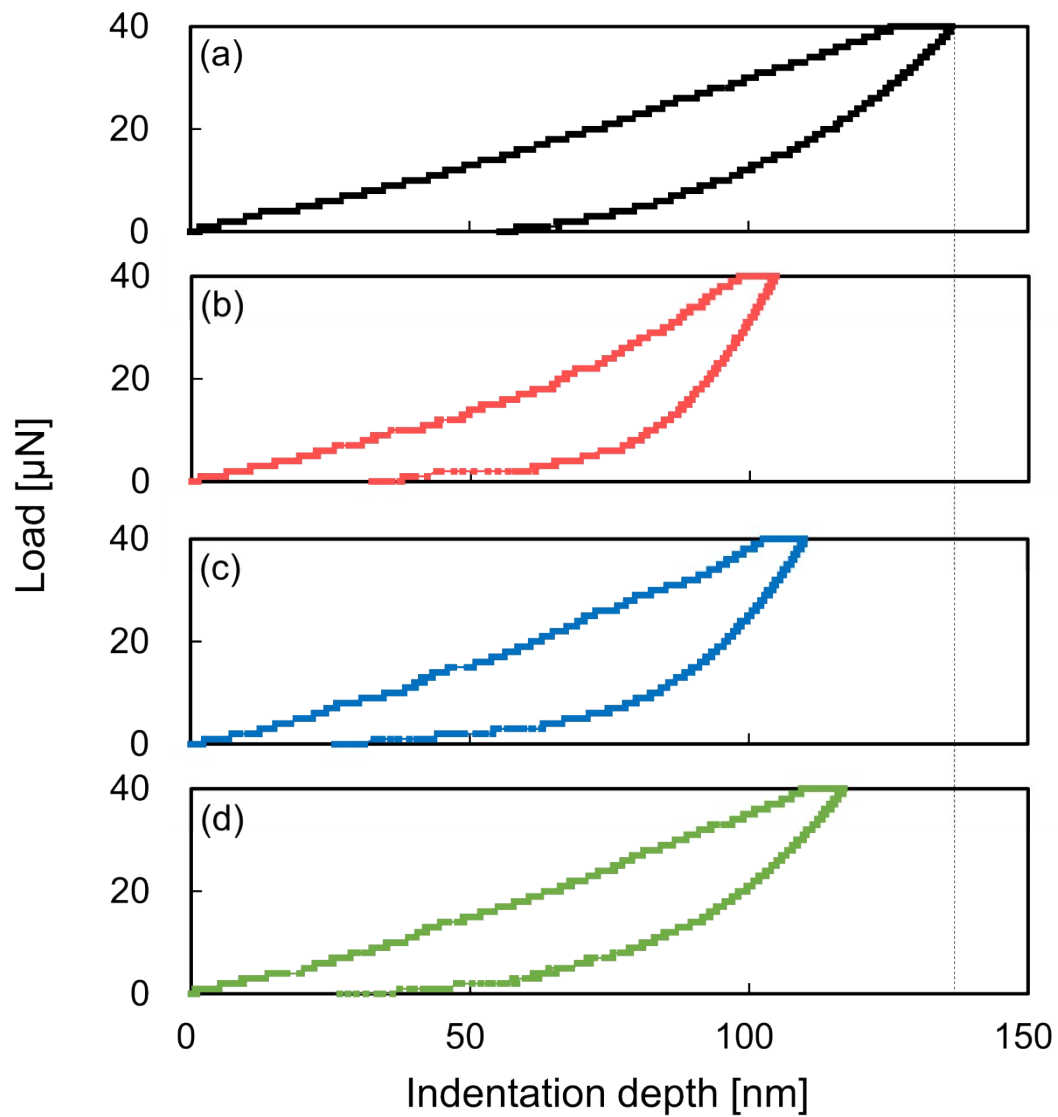

**ESI-4** Representative load-depth curves of PTFE samples without or with HAP treatments in different air concentrations: (a) as-received, (b) HAP-treated in 0.01% air, (c) HAP-treated in 0.5% air, and (d) HAP-treated in 2.0% air.
